# Supplementary material for: True-3D Accentuating of Grids and Streets in Urban Topographic Maps Enhances Human Object Location Memory
Source: PLoS One. 2015 Feb 13;10(2):e0116959. doi: 10.1371/journal.pone.0116959 (PMC4334546; doi:10.1371/journal.pone.0116959)
Supplement: S3 Data — (XLS) [file pone.0116959.s003.xls]

## Sheet: Tabelle1
Subject_ID	Age	Sex	Dimension_Group	Map1_Gelsenkirchen_POI1	Map1_Gelsenkirchen_POI2	Map1_Gelsenkirchen_POI3	Map1_Gelsenkirchen_POI4	Map1_Gelsenkirchen_POI5	Map2_Hagen_POI1	Map2_Hagen_POI2	Map2_Hagen_POI3	Map2_Hagen_POI4	Map2_Hagen_POI5	Map3_Herne_POI1	Map3_Herne_POI2	Map3_Herne_POI3	Map3_Herne_POI4	Map3_Herne_POI5	Map4_Marl_POI1	Map4_Marl_POI2	Map4_Marl_POI3	Map4_Marl_POI4	Map4_Marl_POI5	Map5_Muelheim_POI1	Map5_Muelheim_POI2	Map5_Muelheim_POI3	Map5_Muelheim_POI4	Map5_Muelheim_POI5	Map6_Duisburg_POI1	Map6_Duisburg_POI2	Map6_Duisburg_POI3	Map6_Duisburg_POI4	Map6_Duisburg_POI5
1	23	f	3D	2.83	16.28	4.12	3.61	9999	8.49	10.2	3.16	12.04	9999	2.24	4.24	5.39	4.24	4.47	8.6	15.81	14.87	21.93	9999	4	3.61	1	5	180.14	2.83	6.32	24.21	10.44	9999
2	24	m	3D	0.01	250.7	4.47	55.08	168.94	6.08	3.61	3.16	2.24	23	197.4	7.21	11.7	8.6	293.47	3.16	1	42.06	130.31	92.09	7.21	3	13.04	24.7	8.06	17.03	109.56	64.26	11.05	3.16
3	25	f	3D	7.21	5.39	5.1	15.65	4.12	8.49	14.21	5	12.21	11.66	22.2	7.81	6	9999	9999	5.39	9.49	1	3.61	12.65	2.24	11.4	5.1	21.26	4.12	4.12	5.1	4.24	12.73	21.59
4	24	f	3D	11.18	8.06	16	9999	9999	8	17.26	39.05	174.47	96.26	8.94	19.42	10.77	12.37	233.11	45.62	90.14	44.55	8.06	14.21	17	8.25	8.06	5.66	9999	139.28	6.4	10.2	81.99	23.85
5	22	m	3D	12.04	15	26.08	11.18	110.02	10	77.41	11.4	94.09	37.22	7.28	13.04	11.4	14.76	80.62	12.37	12.53	13	6.32	9999	15.62	11	7.81	13.89	20.22	13.04	17.26	10.77	237.41	190.16
6	28	m	3D	3	2.83	1.41	3.61	2	3.61	6.08	0.01	3	2.24	2.24	2.24	1	62.17	79.98	2.24	2	1	3	77.47	2.24	5	2.24	1	62.64	4.12	2.24	141.51	5.1	180.24
7	26	f	3D	13.42	5.1	0.01	21.47	7.81	3.16	6.71	2.24	4.12	5.39	6	10.2	3	4.24	9.22	3.16	5	6.71	6.71	2.24	5	2	4.12	9.06	5.1	7.21	1.41	1.41	5	3.61
8	29	m	3D	10	7.28	14.32	61.1	4.47	20.12	4.47	186.08	156.92	106.94	11.05	24.41	5.1	15.81	6.32	47.01	2	10.2	29	133.79	8.06	8.94	10	5.66	42.54	34.44	9.06	10	9.85	9999
9	25	m	3D	2.24	16.12	6.71	1.41	9.22	0	4.12	6.4	1	7.07	8	14.87	3.16	76.11	67.12	5.83	5.39	5.1	6.08	13	9.06	20.12	8.06	4.47	2.24	21.1	14.56	10.82	13	9999
10	28	m	3D	1	4.47	2.24	3.16	4	2	1	1	9999	9999	3.61	4.12	1	4.24	2.83	1	3.61	3.61	2.83	5	5.39	3.61	3	1	8.06	5.66	4.47	66.94	1	2.24
11	21	f	3D	13	17.03	5	2.83	2.24	11.7	2.24	3.16	13.34	6	13.34	10.82	77.1	3	11.18	15.13	5	2.24	5	3.16	1.41	17.69	1	8.94	5.1	1	7.81	83.38	14.21	204.08
12	22	f	3D	5.39	4.24	19.7	4	33.12	7.07	1	8.6	138.52	47.07	5.39	4.47	3.61	3.61	23.09	5	4	6	150.57	9999	2.83	43.84	70.01	132.54	182.47	2.24	10.05	14.14	13.93	5.39
13	20	f	3D	16.28	2.24	4.12	5	4.47	4	2.24	6.32	3.61	9.43	5	3	2.24	0.01	2.24	3.16	2.24	6	4.47	2	3.16	1.41	1.41	2	119.52	2.24	2.24	9.22	2.24	202.97
14	25	m	3D	12.04	40.5	6.32	3	23.77	1.41	7	5.83	13.93	10.77	8.49	8.06	7.21	13.45	68.88	7.62	4.12	18.36	36.62	28.65	13.15	22.02	8.25	28.16	26.25	8.6	8.94	2.83	4.12	16.12
15	23	f	3D	15.81	8.54	16.4	7.81	2.83	10.82	10.05	16.4	4.24	74.95	2.83	3.16	3.16	9.43	131.24	0.01	7.21	69.05	34.21	90.14	61.72	3.16	9999	9999	9999	7.07	10.63	260.23	7.28	37.34
16	26	m	3D	10.3	12.81	10.77	3.61	46.62	10.2	2.24	6.71	4.47	12.53	7.28	7.21	9.49	3.16	123.17	5.1	2.24	82.02	33.73	9999	8.06	14.04	10.05	7.28	12.37	6.08	6.32	5.1	9.85	14.14
17	20	f	3D	4.24	23.71	6.4	1.41	6.08	4	4.47	69.4	79.16	141.53	2.24	3.61	7.07	21.47	91.05	3.16	2.24	1	15.81	1	8.6	6.71	11.05	7	105	5.83	2	28.02	5	2
18	22	m	3D	4.24	3	3.16	3.61	84.21	4	3	3.16	65.19	178.27	4.47	0.01	1	2	2	3.61	2.24	5.1	2.24	108.24	5	2.83	3.16	59.21	1	0.01	1	2.24	2.24	2.24
19	23	f	3D	17.03	5.1	19.24	90.02	112.64	8.06	6.32	42.01	8.06	9.85	12.37	11.31	45.79	10.44	14.87	65.19	13.15	5.83	25.08	13.15	4.47	5.39	11.66	9999	9999	14.21	5.39	101.39	9999	9999
20	26	f	3D	4.47	9.43	1	65.92	3.61	5.1	2.24	38.01	8.25	3.16	2.24	5.83	1.41	5	5	8.6	2.83	6.08	6.32	2.24	5.1	3.16	7.07	20.81	5	8.25	1	1.41	5.66	54.41
21	25	f	3D	16.64	8.94	8.6	7.62	16.55	0.01	6.4	7.28	33.24	27.73	7.07	22.02	21.19	24.7	18.03	5.39	2.24	4.12	14.04	22.47	7.28	24.19	11.18	14.21	9999	17.72	9.22	17.03	3.16	9999
22	29	m	3D	2.24	3.16	5.1	4.24	59.03	2.24	4.12	2.83	67.05	6.08	1	9.06	2.83	2.24	4.12	2.24	331.62	1.41	3.16	151.95	5.66	3.16	4.47	9.85	4.12	516.81	354.46	6.4	3.16	3
23	24	f	3D	3.61	4	4	5.66	5	12.53	8.6	3.61	3	4.24	1.41	1	2.24	6.4	3.61	5.66	2	3	4.12	1	1.41	3	3.61	4.24	4.47	6	12.81	9.9	3.16	3.16
24	23	f	3D	8	4.12	12.04	63.35	9999	8.6	2.24	10.3	26	17.72	8.25	5.1	65.31	5.1	131.02	1.41	2.24	8.25	57	5	7.62	117.89	11	37	40.92	80.78	2.24	1	6.4	9999
25	26	m	3D	6.32	6.08	20.62	5	12.65	2.83	10.82	5	24.08	100.02	25.08	10.2	53.94	9.49	23.77	31.05	3.16	12.81	20.62	9	10	16.12	14.21	13.6	25.06	51.04	12.37	56.59	59.01	15.81
26	28	m	3D	2.83	3	1.41	3.61	22.36	5	15.81	1.41	3.61	4	5.39	16.76	3.16	3.61	7.28	11	8.25	3	1	6.08	2.83	1	4.47	5.1	74.22	6.32	3.16	11	2.24	3.61
27	24	f	3D	6.32	5	45.97	21.26	5	5	1	60	8.54	20.62	53.08	9.49	67.42	17.46	14.87	19.65	21.95	13.34	49.74	16.28	6.08	16.4	65.76	12.04	10.2	13.45	19.65	10.3	23.35	104.24
28	24	m	3D	12.53	4.24	1	3.16	6.08	2.24	4.24	4.47	7.81	4	2.83	8.25	7.81	1.41	10.2	3	3.16	2.83	8.06	7.81	4	1.41	5	3.16	4.12	9.22	4.12	44.69	2.24	9999
29	25	m	3D	5.83	2.24	5	44.64	18.68	2.24	1.41	208.12	3.61	1	4.24	23.41	7.21	15.03	6.4	1.41	14	461.9	7.07	2.24	2	59.08	14.56	6.71	2	13.04	1	1	3.61	3
30	23	f	3D	30.08	12.53	4.24	8.94	7.28	12.04	2.83	5	9.85	11.18	0.01	5	5	2.24	5	3.61	3.16	2	5	9999	5.1	5	5.39	11.4	12.37	2.83	2.83	4.47	42.11	10.63
31	23	m	2D	37.66	20.25	7.81	10.44	8.06	7.81	7.21	17.09	5	65	30.81	22.09	7.28	3.16	7.07	20	276.52	93.49	85.6	80.31	8.54	21.84	14.87	14.32	134.54	3	24.7	165.85	197.19	64.4
32	26	m	2D	7.21	8	7.07	11.66	8.94	14.87	9.06	14.42	72.9	9999	11.18	24	8.6	17.03	276.21	72.92	35.9	15	4.12	174.04	21.21	16.16	11.7	21.63	8.54	3.16	28.07	16.12	15	49.82
33	29	m	2D	10.77	21.1	7.28	10	149.57	13.04	7.21	4	31.38	16.4	8.94	14.14	19.24	9.22	8.6	14.04	24.6	16.28	8.6	107.49	28.46	19.24	15.52	35.47	101.91	7	13.6	10	6.71	8.54
34	28	f	2D	2.24	2	11.4	16.49	8.25	14.32	2.24	7.62	65.79	1.41	5.39	11.4	22	64.5	9.85	4.24	10.3	5.83	91.05	5.1	12.08	18.97	21.02	97.62	8.54	35	6.08	9.85	42.52	13
35	22	m	2D	5.83	26.68	9.49	13.04	9999	7	30.53	26.42	23.41	6.4	6.32	10.63	25.94	21.02	9999	5.66	12.17	3	9999	9999	10.82	6.32	22.47	3.16	80.81	14.14	7.07	31.38	6.08	89.54
36	23	f	2D	3.16	20.88	3.16	12.37	135.15	22.56	33.6	15.52	15.62	21.1	8.06	9.9	8.06	10.44	9999	15.65	15.62	95.05	21.63	9999	18.87	29.12	19.7	25	20	10.05	8	11.18	14.56	9999
37	25	m	2D	7.07	6	2.24	5.1	20.52	9	3.16	36.06	7.07	11	10	4.47	8.06	25.02	15.81	5.66	5.66	2.24	6.32	10.82	10.3	10	12.04	6.71	7.62	12.04	5.1	14.32	5.39	5.1
38	26	m	2D	15.65	3.16	7.21	7.07	5.39	7.81	10.2	3.61	4.12	5.1	0.01	11.18	2	2.24	2	3.61	5.39	2.24	4.47	4.12	2.24	2.83	9.22	6.4	3.16	16.28	10.77	4.12	46.4	12.04
39	25	m	2D	0.01	7.62	5.66	3	10.44	5.39	2.83	15	2	58.42	8.54	4.12	3.16	6.32	120.7	8.6	7.07	7	7.21	7.81	5	3.16	7.81	7.07	6.71	1.41	8.54	6	5.39	5.83
40	23	m	2D	64	70.43	8.06	45.12	10.63	17.89	9	6.08	31.4	24.19	28.6	11	24.35	23.77	35.01	2.24	5.39	26.4	6.32	21.21	10.82	21.47	2	19.03	12.04	2.24	26.4	14.32	13.04	11.4
41	25	f	2D	8.25	3.61	47.01	21.59	34.01	7.28	6.32	19.24	22.63	30.02	9.06	6.32	6.71	6.71	42.95	1	16.97	7.07	6.32	5.83	22.63	9.9	39.05	9.06	6.32	14.32	8.06	17.49	9999	9999
42	23	f	2D	9.06	6.32	5.1	176.66	32.45	11.31	2	27.2	7.21	11.66	29.07	14.76	53.85	100.26	89.27	4.12	10.82	10.3	1	3	20.62	10.3	12.04	5.83	14.56	111.22	29.15	66.07	57.27	9999
43	25	m	2D	9.85	2.24	33.62	9.49	9999	5	7.81	11	5	92.62	3.16	5	5	18.03	8.54	1	2.24	6.32	9.22	9999	9.22	1	3.61	8.6	12.65	76.49	17.46	1	4.47	44.64
44	21	f	2D	5	9	2	10	1	7.21	4.47	3.16	20.88	2.24	3.16	3.16	4.24	5	8.54	1.41	0.01	5.39	2.24	2.83	1.41	4.12	2	9999	9999	5	8.6	17.46	7.21	5.1
45	23	f	2D	70.88	8.54	3.16	1.41	9999	29	55.22	5.83	85.01	9999	7.07	103.95	6.32	1.41	20.62	9	30.61	11.7	20.62	24.7	2.83	8.25	10.44	13.34	39.45	14.04	14.32	14.21	34.21	58.55
46	23	f	2D	7.81	17.03	74.17	122.26	9999	16.16	45.28	231.26	75.17	117.69	51.88	6.08	122.71	15.03	18.25	4.47	6.71	12	200.42	20.22	67.96	27.17	29.27	113.22	1.41	12.37	50.92	20.25	86.02	9999
47	28	f	2D	6.71	9.06	28.64	19.03	15.23	5.83	24.21	9.22	19.31	15.81	15.26	35.17	16.49	21.54	18.38	24.6	16.28	70.83	16.55	11.05	5.83	5.1	26.08	10	5	18.25	12.73	16.64	22.67	24.08
48	21	f	2D	13.15	4.12	61.74	35.51	9999	10.3	13.04	10.05	29.21	20.02	5	18.68	13.04	79.4	81.74	7.21	232.69	19.21	12	57.31	14.32	10.44	15.52	20.81	152.12	9.49	6.71	2	2.24	9999
49	27	m	2D	8.54	8.49	7.21	9.22	5.39	9.43	7.07	5.66	6.32	5.39	5.39	22.09	2.24	8.06	3.16	4	3.16	1	8.6	1	8.06	3.61	10.77	4.12	11	9.85	10.44	6.08	6.4	9.43
50	29	m	2D	2.24	2.83	8.6	30.02	6.08	20.62	5.83	14.04	15.52	22.83	38.47	269.21	69.35	116.02	103.02	108.47	45.31	55.01	34.48	17.89	33.73	44.2	3	14.04	37.34	32.98	7.21	10	4.12	21.47
51	25	m	2D	2.83	7.28	2	2.24	9.43	6.4	1.41	2.24	1	2.24	4.24	1	4	2.24	4.47	1.41	7.62	23	13.34	20.88	5.66	2.83	4.12	0.01	3	2.24	3.61	0.01	4.12	5.1
52	25	f	2D	17.89	7.28	24.35	7.21	129.2	7.07	18.38	47.89	43.42	3.16	21.26	10.2	17.8	165.42	60.75	3.61	15.3	13.45	13	34.13	134.18	11.31	198.22	14.32	9999	14.21	17.72	98.35	56.08	21.1
53	23	m	2D	0.01	24.19	5	2.24	9999	6.4	21.21	51.48	51.4	187.92	27.46	12.73	9	8.49	205.14	1	29.07	29.15	22.67	74.22	1.41	2	27.46	66.53	9999	3.16	1.41	10	9999	9999
54	25	m	2D	10.44	4.12	2	9999	9999	7	5.1	8.6	31.14	9999	9	8.25	6.32	11.4	9999	3.16	10.77	16.16	7.07	9999	3.61	14	40.52	28.02	9999	2.83	6.71	2.24	104.69	11.18
55	24	m	2D	3.61	17.2	21.4	125.21	39	35.78	5.39	6.71	5.39	5	9.43	17.03	7.21	19.92	16.97	5.39	5.66	12.81	7.81	39.29	10.77	18.38	9.22	8.54	2.24	19.03	47.17	8.06	25.06	18.03
56	28	f	2D	4.24	2.83	7.28	30.41	3	135.48	51.55	7.07	2.24	6.08	5.1	4.24	3.16	5.1	10.05	4.12	51.62	5.1	2.83	16.12	4.12	11	3.61	5.1	25.5	10	43.08	12.81	10.44	9999
57	22	m	2D	8.94	5	4	2	4.47	2.24	13.42	3	17.72	9.22	5.1	10.63	4.12	4.12	86.53	8.94	2.24	13.45	185.69	17.03	6.08	6.4	7.21	2.24	3.61	8.06	5.1	144.93	86.37	108.02
58	23	f	2D	19.8	23.32	8.06	20.88	93.13	27.46	17.26	13.93	25.55	23.26	15.03	7.81	2.24	25.3	13.89	3.61	17.8	22.36	20.4	16.28	2.24	4.47	21.19	31.26	64.03	5	36.69	4.47	14.32	18.11
59	23	f	2D	9.85	107.08	10.3	2.24	14.04	6.08	7	9999	9999	9999	15.23	23.09	63.7	66.73	53.08	13.89	175.01	6.4	2.24	9999	68.59	65.01	92.05	7.81	7.21	53.54	45.49	53.81	25.06	83.43
60	23	m	2D	5	3	17.49	4	0.01	7.28	3.16	4.47	3.16	38.83	2.24	3.61	4	8.94	9999	1	5.39	8.6	3.61	7.28	7.81	5.39	6.71	5.39	43.97	8.94	6.32	8	41.18	14.14
